# Supplementary material
Source: Frontiers journal article supplement (https://www.frontiersin.org/articles/225653)

**Figure S6. Transmembrane prediction using PRED-TMR algorithm**

Transmembrane segments were analysed and visualised using transmembrane prediction method of the PRED-TMR algorithm for PdCLO2 (A) and PdCLO4 (B). This algorithm is based on a novel statistical analysis method that can predict the location of transmembrane segments using protein sequence information only. The transmembrane prediction algorithm utilises SwissProt database resources.

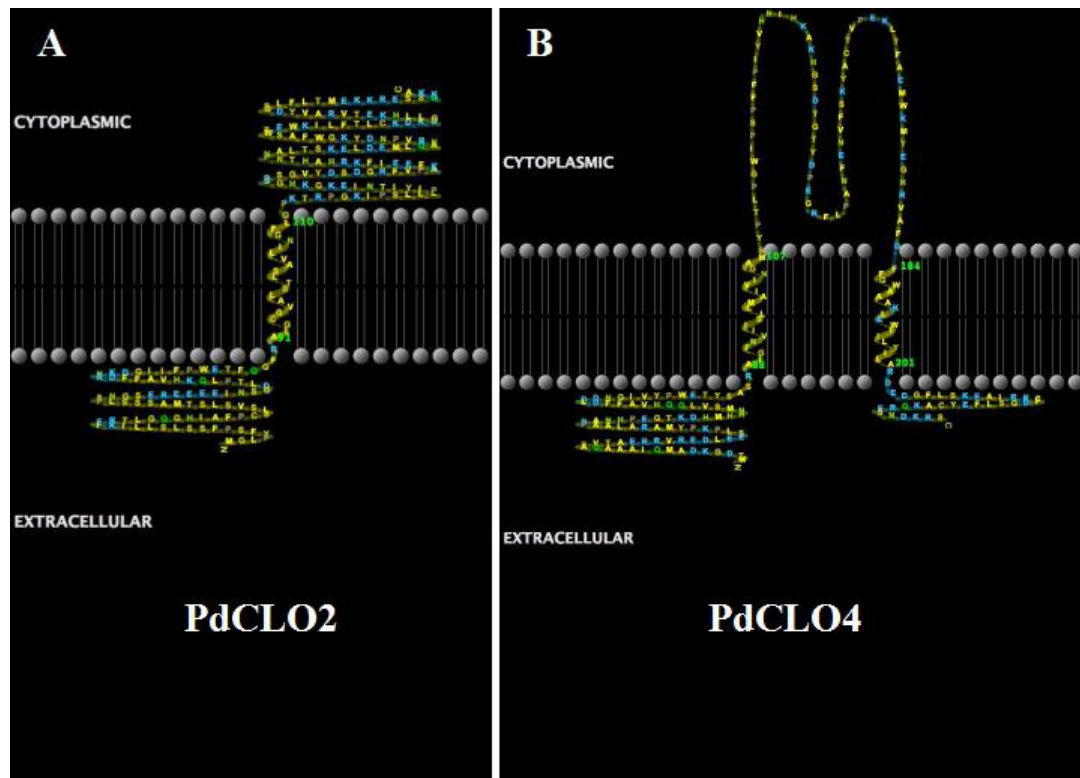

Supplement: Data_Sheet_2.PDF [file Data_Sheet_2.PDF]
